# Supplementary material for: Crystallization and conformation engineering of solution-processed polymer transparent electrodes with high conductivity
Source: Royal Society of Chemistry journal article supplement (doi:10.1039/c6tc04446h), 2016-12-06
Supplement: c6tc04446h1.pdf [file c6tc04446h1.pdf]

**Supporting information**

**Crystallization and Conformation Engineering of Solution-process Polymer  
Transparent Electrodes with High Conductivity**

Aifeng Hu<sup>a</sup>, Licheng Tan<sup>a,b</sup>, Xiaotian Hu<sup>a</sup>, Lin Hu<sup>a</sup>, Qingyun Ai<sup>a</sup>, Xiangchuan Meng<sup>a</sup>,  
Lie Chen<sup>\*a,b</sup> and Yiwang Chen<sup>\*a,b</sup>

<sup>a</sup>College of Chemistry, Nanchang University, 999 Xuefu Avenue, Nanchang 330031,  
China

<sup>b</sup>Jiangxi Provincial Key Laboratory of New Energy Chemistry/Institute of Polymers,  
Nanchang University, 999 Xuefu Avenue, Nanchang 330031, China

Corresponding author. Tel.: +86 791 83968703; fax: +86 791 83969561. E-mail:  
ywchen@ncu.edu.cn (Y. Chen), chenlie@ncu.edu.cn (L. Chen).

Author contributions. A. Hu, L. Tan and X. Hu contributed equally to this work.

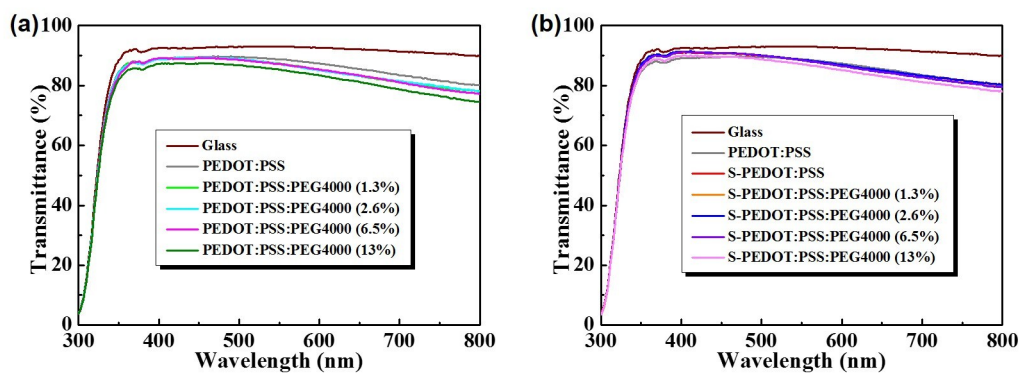

**Figure S1.** (a) The transmittance spectra of glass, pristine PEDOT:PSS and modified PEDOT:PSS by polyethylene glycol 4000 (PEG4000) with various weight ratios in the range from 300 nm to 800 nm. (b) The transmittance spectra of glass, pristine PEDOT:PSS, H<sub>2</sub>SO<sub>4</sub>-treated PEDOT:PSS (S-PEDOT:PSS), S-PEDOT:PSS (~40 nm) with various weight ratios of PEG4000 in the range from 300 nm to 800 nm.

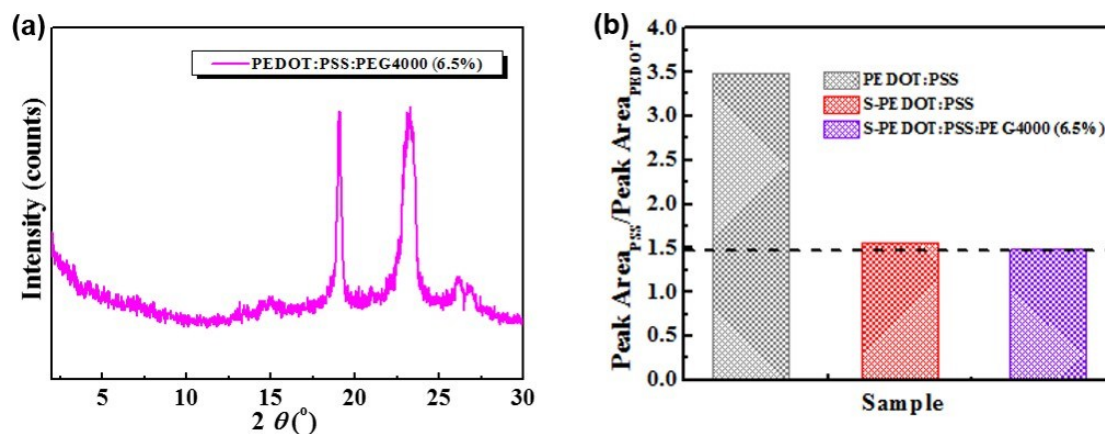

**Figure S2.** X-ray diffraction (XRD) pattern of PEDOT:PSS with 6.5 wt% PEG4000 (PEDOT:PSS:PEG4000 (6.5%)) in the range from 2° to 30°. (b) The peak area ratios of PSS to PEDOT of pristine PEDOT:PSS, S-PEDOT:PSS and H<sub>2</sub>SO<sub>4</sub>-treated PEDOT:PSS with 6.5 wt% PEG4000 (S-PEDOT:PSS:PEG4000 (6.5%)) in X-ray photoelectron spectroscopy (XPS) S(2p) spectra by XPS peak processing.

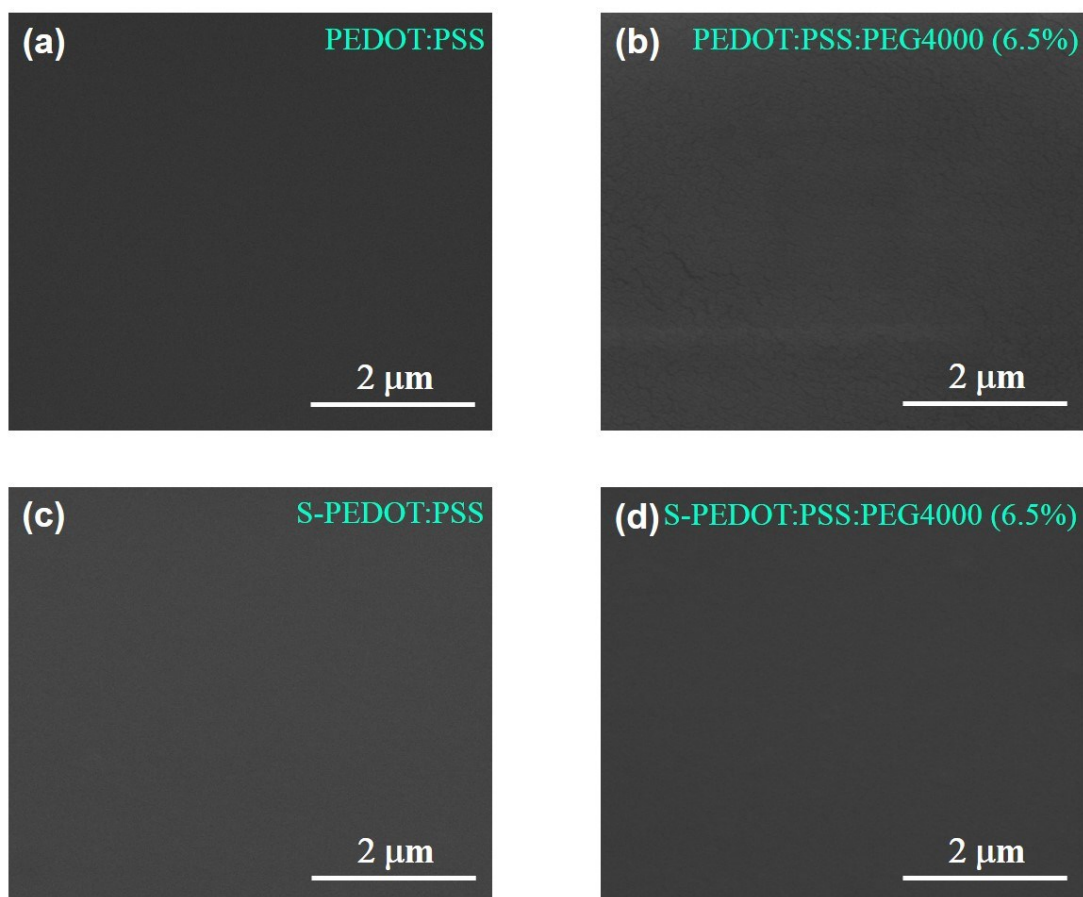

**Figure S3.** Low-magnification scanning electron microscopy (SEM) images of (a) pristine PEDOT:PSS, (b) PEDOT:PSS:PEG4000 (6.5%), (c) S-PEDOT:PSS and (d) S-PEDOT:PSS:PEG4000 (6.5%).

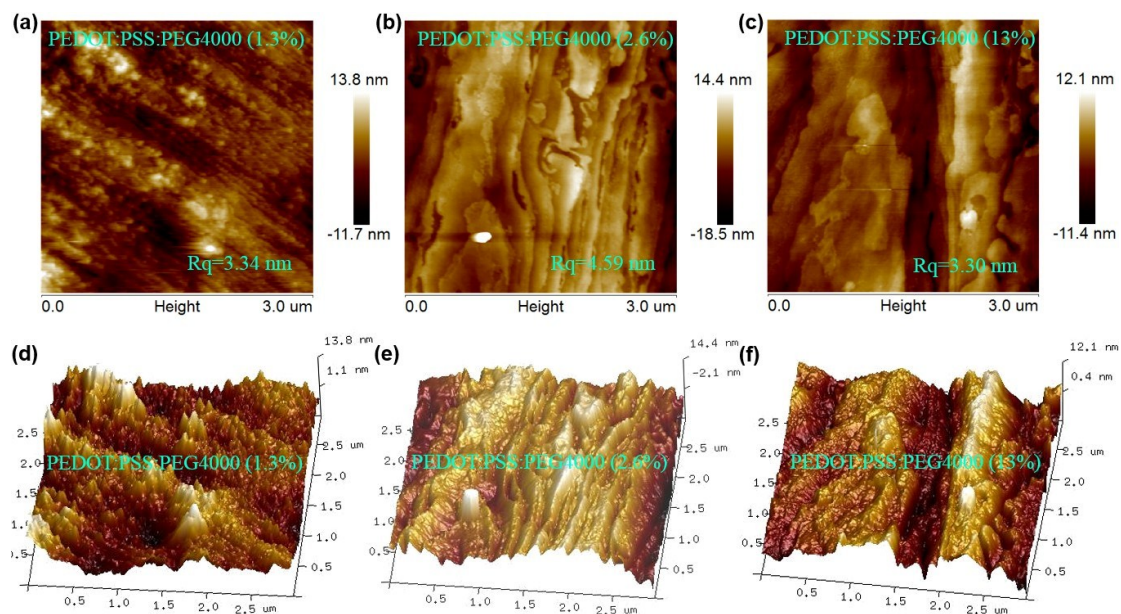

**Figure S4.** Atomic force microscope (AFM) height images of (a) PEDOT:PSS:PEG4000 (1.3%), (b) PEDOT:PSS:PEG4000 (2.6%), (c) PEDOT:PSS:PEG4000 (13%) and the corresponding three-dimensional images of (d) PEDOT:PSS:PEG4000 (1.3%), (e) PEDOT:PSS:PEG4000 (2.6%), (f) PEDOT:PSS:PEG4000 (13%), respectively.

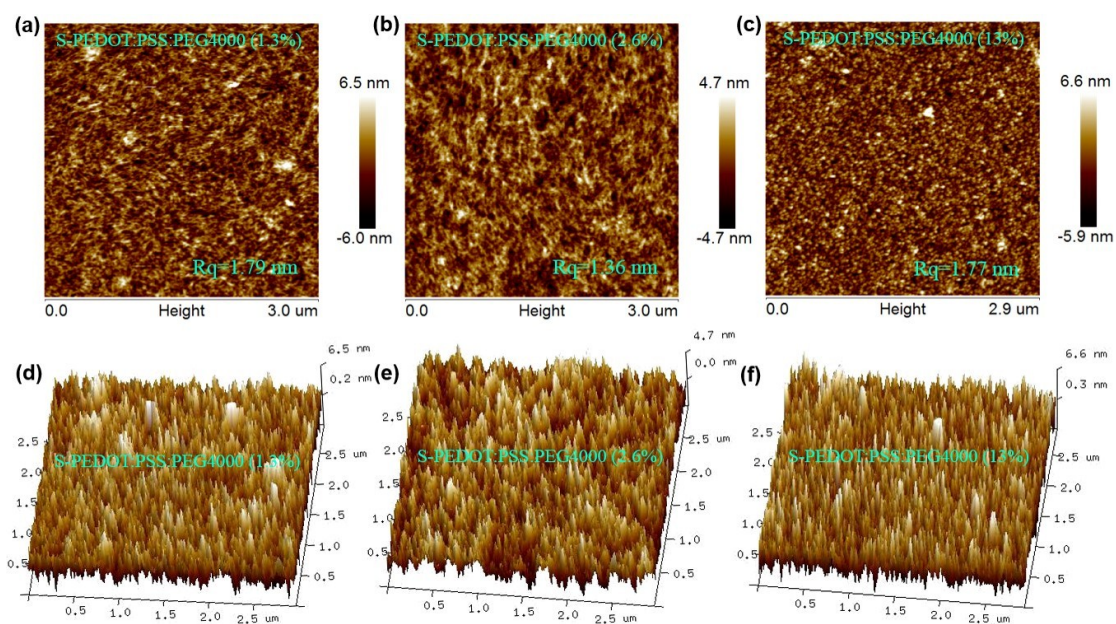

**Figure S5.** AFM height images of (a) S-PEDOT:PSS:PEG4000 (1.3%), (b) S-PEDOT:PSS:PEG4000 (2.6%), (c) S-PEDOT:PSS:PEG4000 (13%) and the corresponding three-dimensional images of (d) S-PEDOT:PSS:PEG4000 (1.3%), (e) S-PEDOT:PSS:PEG4000 (2.6%), (f) S-PEDOT:PSS:PEG4000 (13%), respectively.

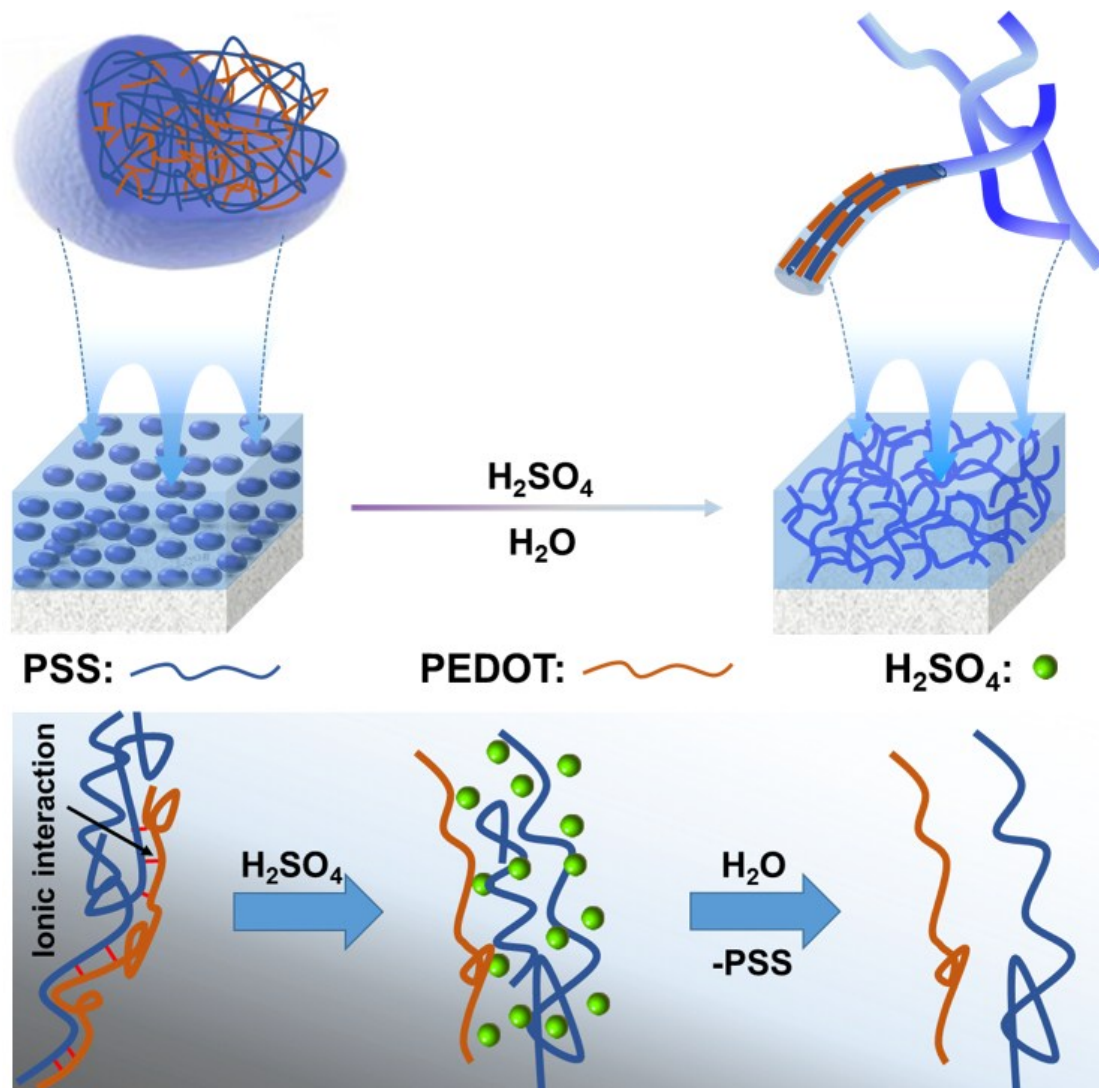

**Figure S6.** The schematic diagram of the configuration change of PEDOT:PSS during the treatment of  $H_2SO_4$ , as well as the simplified mechanism diagram.

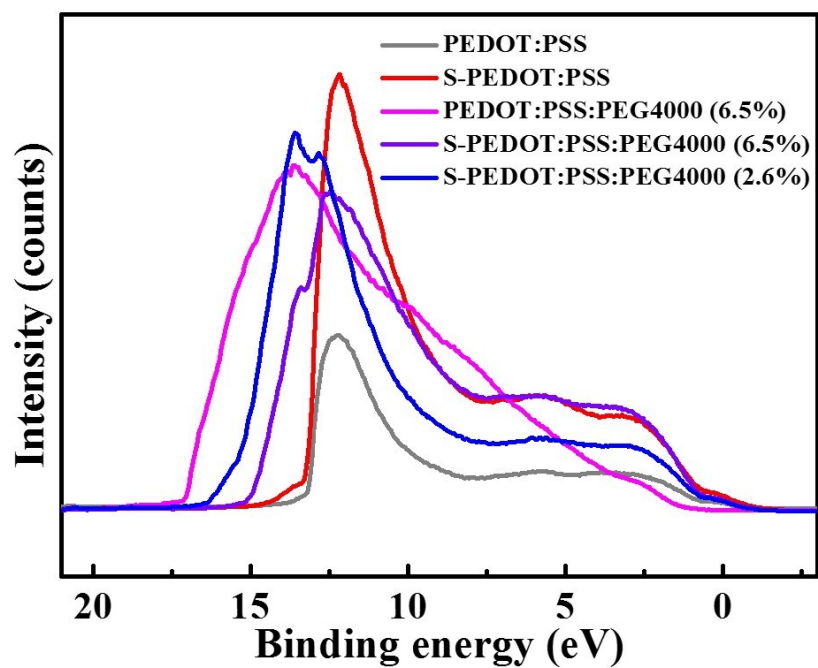

**Figure S7.** Ultraviolet photoelectron spectroscopy (UPS) spectra of PEDOT:PSS, S-PEDOT:PSS, PEDOT:PSS:PEG4000 (6.5%), S-PEDOT:PSS:PEG4000 (2.6%) and S-PEDOT:PSS:PEG4000 (6.5%).



**Table S1.** The work functions estimated via kelvin probe force microscope (KPFM) of gold (Au), PEDOT:PSS, S-PEDOT:PSS, PEDOT:PSS:PEG4000 (6.5%) and S-PEDOT:PSS:PEG4000 (6.5%), respectively.

| Transparent<br>electrode | Au      | PEDOT:PSS | S-PEDOT:PSS | PEDOT:PSS:<br>PEG4000<br>(6.5%) | S-<br>PEDOT:PSS:PE<br>G4000 (6.5%) |
|--------------------------|---------|-----------|-------------|---------------------------------|------------------------------------|
| Work<br>function (eV)    | -5.1000 | -4.8340   | -4.7330     | -4.1420                         | -4.5760                            |

We select gold as the reference standard to estimate the work functions of the pristine and hybrid PEDOT:PSS films under the same conditions. The potential of the probe is -4.2650 eV.

**Table S2.** The work functions estimated by ultraviolet photoelectron spectroscopy (UPS) of PEDOT:PSS, S-PEDOT:PSS, PEDOT:PSS:PEG4000 (6.5%), S-PEDOT:PSS:PEG4000 (2.6%) and S-PEDOT:PSS:PEG4000 (6.5%), respectively.

| Transparent<br>electrode | PEDOT:PSS | S-PEDOT:PSS | PEDOT:PSS:<br>PEG4000<br>(6.5%) | S-<br>PEDOT:PSS:P<br>EG4000<br>(2.6%) | S-<br>PEDOT:PSS:P<br>EG4000<br>(6.5%) |
|--------------------------|-----------|-------------|---------------------------------|---------------------------------------|---------------------------------------|
| Work<br>function (eV)    | -5.5      | -5.1        | -3.6                            | -3.8                                  | -3.7                                  |

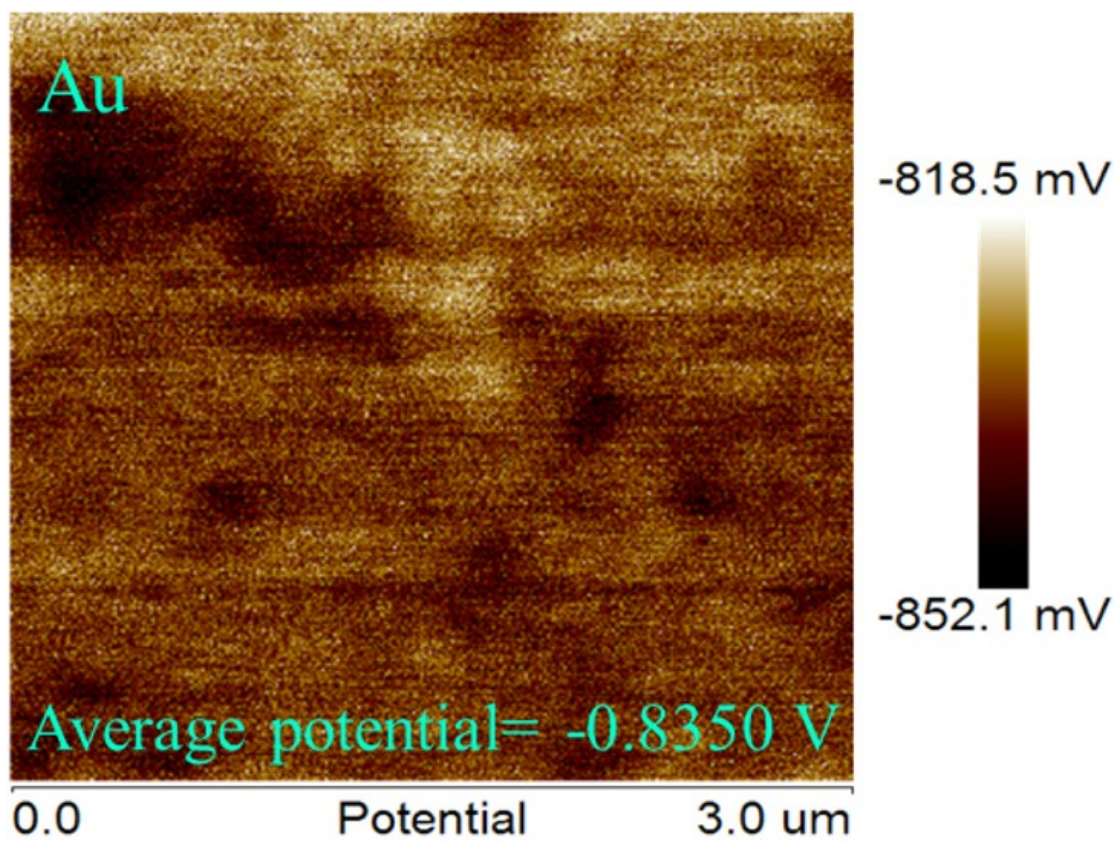

**Figure S8.** Kelvin probe force microscope (KPFM) image of gold (Au).

**Table S3.** Device parameters of the inverted structure based on glass substrate/cathode/zinc oxide (ZnO)/active layer/molybdenum trioxide (MoO<sub>3</sub>)/silver (Ag).

| Cathode                    | Active layer              | $J_{sc}$ (mA cm <sup>-2</sup> ) | $V_{oc}$ (V) | FF (%) | PCE (%)               |
|----------------------------|---------------------------|---------------------------------|--------------|--------|-----------------------|
| PEDOT:PSS                  | P3HT:PC <sub>61</sub> BM  | 2.788                           | 0.592        | 45.7   | 0.8(1.0) <sup>a</sup> |
| S-PEDOT:PSS                | P3HT:PC <sub>61</sub> BM  | 8.318                           | 0.558        | 43.4   | 2.0(2.3) <sup>a</sup> |
| S-PEDOT:PSS:PEG4000 (2.6%) | P3HT:PC <sub>61</sub> BM  | 8.359                           | 0.610        | 51.8   | 2.6(2.8) <sup>a</sup> |
| S-PEDOT:PSS:PEG4000 (6.5%) | P3HT:PC <sub>61</sub> BM  | 9.003                           | 0.620        | 57.0   | 3.2(3.3) <sup>a</sup> |
| S-PEDOT:PSS:PEG4000 (13%)  | P3HT:PC <sub>61</sub> BM  | 7.938                           | 0.613        | 53.3   | 2.6(2.7) <sup>a</sup> |
| ITO                        | P3HT:PC <sub>61</sub> BM  | 8.120                           | 0.604        | 60.0   | 2.9(3.1) <sup>a</sup> |
| S-PEDOT:PSS                | PTB7: PC <sub>71</sub> BM | 9.354                           | 0.715        | 64.7   | 4.3(4.6) <sup>a</sup> |
| S-PEDOT:PSS:PEG4000 (6.5%) | PTB7: PC <sub>71</sub> BM | 15.880                          | 0.744        | 68.6   | 8.1(8.3) <sup>a</sup> |
| ITO                        | PTB7: PC <sub>71</sub> BM | 13.045                          | 0.726        | 66.5   | 6.3(6.5) <sup>a</sup> |

a: The best PCE. Each cell had the effective area of 0.15 cm<sup>2</sup>.

**Table S4.** Device parameters of the conventional structure based on glass substrate/anode/PEDOT:PSS Al 4083/active layer/lithium fluoride (LiF)/aluminum (Al).

| Anode                      | Active layer              | $J_{sc}$ (mA cm <sup>-2</sup> ) | $V_{oc}$ (V) | FF (%) | PCE (%)               |
|----------------------------|---------------------------|---------------------------------|--------------|--------|-----------------------|
| PEDOT:PSS                  | P3HT:PC <sub>61</sub> BM  | 7.114                           | 0.500        | 38.7   | 1.4(1.6) <sup>a</sup> |
| S-PEDOT:PSS                | P3HT:PC <sub>61</sub> BM  | 7.747                           | 0.521        | 46.8   | 1.9(2.2) <sup>a</sup> |
| S-PEDOT:PSS:PEG4000 (2.6%) | P3HT:PC <sub>61</sub> BM  | 8.255                           | 0.537        | 48.6   | 2.2(2.6) <sup>a</sup> |
| S-PEDOT:PSS:PEG4000 (6.5%) | P3HT:PC <sub>61</sub> BM  | 8.720                           | 0.590        | 49.7   | 2.6(2.9) <sup>a</sup> |
| S-PEDOT:PSS:PEG4000 (13%)  | P3HT:PC <sub>61</sub> BM  | 7.300                           | 0.584        | 48.5   | 2.1(2.3) <sup>a</sup> |
| ITO                        | P3HT:PC <sub>61</sub> BM  | 8.353                           | 0.610        | 60.5   | 3.1(3.5) <sup>a</sup> |
| S-PEDOT:PSS                | PTB7: PC <sub>71</sub> BM | 12.745                          | 0.732        | 67.3   | 6.3(6.6) <sup>a</sup> |
| S-PEDOT:PSS:PEG4000 (6.5%) | PTB7: PC <sub>71</sub> BM | 13.949                          | 0.744        | 63.4   | 6.6(6.8) <sup>a</sup> |
| ITO                        | PTB7: PC <sub>71</sub> BM | 14.267                          | 0.738        | 69.3   | 7.3(7.6) <sup>a</sup> |

a: The best PCE. Each cell had the effective area of 0.15 cm<sup>2</sup>.

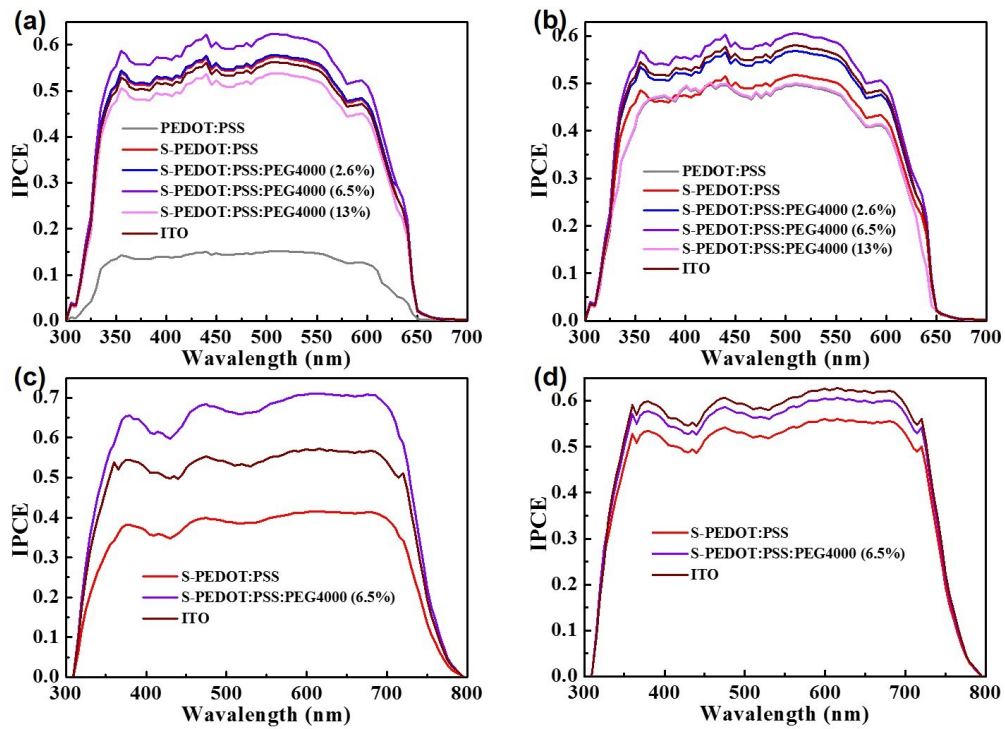

**Figure S9.** Incident photon to current conversion efficiency (IPCE) spectra of (a, c) based on the same inverted structure device with the active layer of P3HT:PC<sub>61</sub>BM and PTB7:PC<sub>71</sub>BM, respectively. IPCE spectra of (b, d) depended on the same conventional structure device with the active layer of P3HT:PC<sub>61</sub>BM and P7B7:PC<sub>71</sub>BM, respectively.
